# Supplementary material for: Gd(iii) complex of a monophosphinate-bis(phosphonate) DOTA analogue with a high relaxivity; Lanthanide(iii) complexes for imaging and radiotherapy of calcified tissues
Source: Royal Society of Chemistry journal article supplement (doi:10.1039/b820705d), 2009-01-01
Supplement: b820705d.pdf [file b820705d.pdf]

# Supporting Information

## A Gd(III) Complex of a Monophosphate-bis(phosphonate) DOTA Analogue with a High $^1\text{H}$ NMR Relaxivity; Lanthanide(III) Complexes for Imaging and Radiotherapy of Calcified Tissues.

Tomáš Vitha,<sup>a</sup> Vojtěch Kubiček,<sup>\*a</sup> Jan Kotek,<sup>a</sup> Petr Hermann,<sup>a</sup> Luce Vander Elst,<sup>b</sup> Robert N. Muller,<sup>b</sup> Ivan Lukeš<sup>a</sup> and Joop A. Peters<sup>\*c</sup>

<sup>a</sup> Department of Inorganic Chemistry, Faculty of Science, Charles University in Prague, Hlavova 8, 128 40 Prague, Czech Republic. Fax: +420-221951253; Tel: +420-221951264; E-mail:

[vvvojta@volny.cz](mailto:vvvojta@volny.cz)

<sup>b</sup> Department of Organic and Biomedical Chemistry, NMR and Molecular Imaging Laboratory, University of Mons Hainaut, B-7000, Mons, Belgium.

<sup>c</sup> Biocatalysis and Organic Chemistry, Department of Biotechnology, Delft University of Technology, Julianalaan 136, 2628 BL Delft, The Netherlands. Fax: +31152781415; Tel: +31152785892; E-mail: [j.a.peters@tudelft.nl](mailto:j.a.peters@tudelft.nl)

### Contents

**Figures S1.**  $^{31}\text{P}\{^1\text{H}\}$  spectra monitoring the complexation of the DO3AP<sup>BP</sup> with Eu(III) ions.

**Figures S2–S15.**  $^{31}\text{P}\{^1\text{H}\}$  and  $^1\text{H}$  NMR spectra of lanthanide(III) DO3AP<sup>BP</sup> complexes (La, Ce, Pr, Nd, Sm, Eu, Tb, Dy, Ho, Er, Tm, Yb, Lu and Y).

**Figure S16.**  $^{31}\text{P}\{^1\text{H}\}$  spectra of Eu- and Yb-DO3AP<sup>BP</sup> complexes at different temperatures.

**Figure S17.**  $^{31}\text{P}\{^1\text{H}\}$  titration curves of SA and TSA diastereoisomers in the Yb-DO3AP<sup>BP</sup> complex and corresponding distribution diagrams.

**Figure S18.** pH dependence of the relaxivity for the Gd-DO3AP<sup>BP</sup> complex.

**Figure S19.** The temperature dependence of reduced  $^{17}\text{O}$  NMR chemical shifts, transverse, longitudinal relaxation rates, and  $^1\text{H}$  NMRD profiles of the Gd-DO3AP<sup>BP</sup> complex at pH = 6.

**Figure S20.** The  $\tau_{\text{R}}$  values of the La-DO3AP<sup>BP</sup> complex as a function of concentration.

**Figure S21.** Luminescence emission spectra of the Eu-DO3AP<sup>BP</sup> complex in the presence of phosphate with and without Zn(II) ions as a function of time.

**Figure S22.**  $^1\text{H}$  NMRD profiles of the Gd-DO3AP<sup>BP</sup>, Gd-BPAMD and Gd-BPAPD complexes adsorbed on HA under analogous conditions (pH = 7.5, 25 °C). Diamagnetic contribution to  $r_1$  was subtracted.

**Table S1.** Experimental parameters found in the crystal structure of DO3AP<sup>BP</sup>·2.25H<sub>2</sub>O.

**Table S2.** Hydrogen bond geometries found in the crystal structure of DO3AP<sup>BP</sup>·2.25H<sub>2</sub>O.

**Table S3.** The relaxivity  $r_1$  and parameters governing it for the Gd-DO3AP<sup>BP</sup> complex at pH 6 and 7.5 as obtained from simultaneous fitting of  $^{17}\text{O}$  NMR and  $^1\text{H}$  NMRD data.

**Table S4.** Luminescence lifetimes of the Eu-DO3AP<sup>BP</sup> complex in the presence of phosphate with and without Zn(II) ions as a function of time.

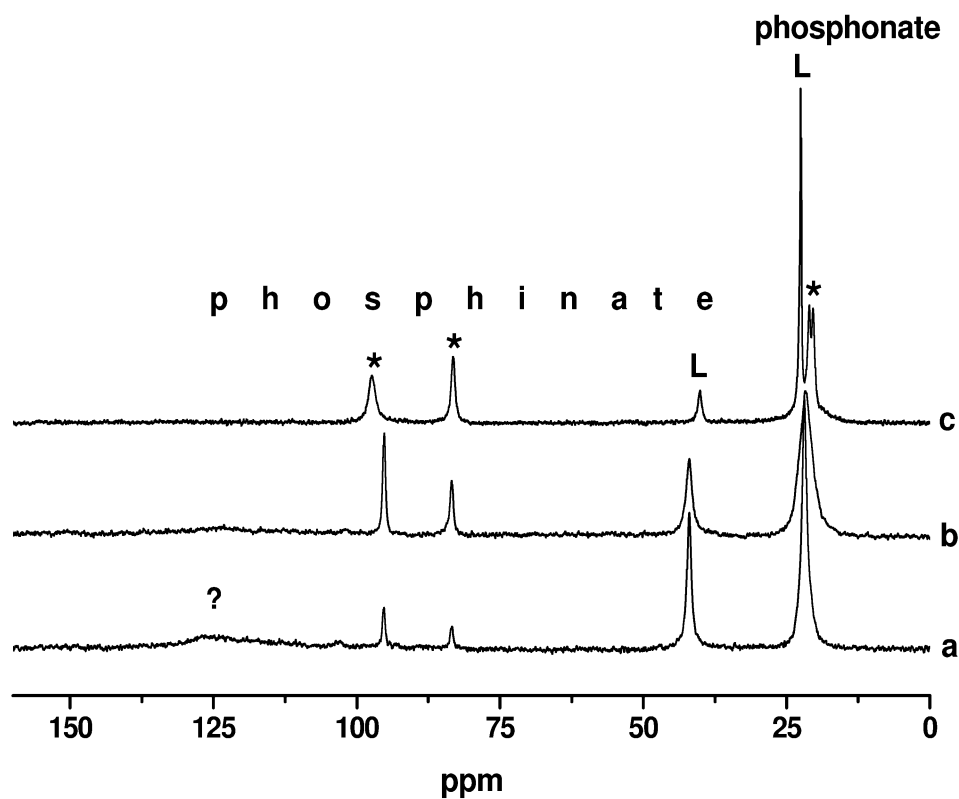

**Figure S1.**  $^{31}\text{P}\{^1\text{H}\}$  spectra monitoring the complexation of the DO3AP<sup>BP</sup> with Eu(III) ions (*a* – 15 min after mixing the ligand and EuCl<sub>3</sub> (0.9 eq.), the initial pH = 9 decreased to 5; *b* – 50 min after mixing, pH = 5; *c* – 2 h after re-adjusting pH to 8). The  $^{31}\text{P}\{^1\text{H}\}$  resonances of the free ligand are labelled with ‘L’. The  $^{31}\text{P}\{^1\text{H}\}$  resonances of the final Eu-DO3AP<sup>BP</sup> complex are labelled with an asterisk. The question mark labels a very broad peak supposedly of an ‘out-of-cage’ complex, where the Eu(III) ion is coordinated by phosphinate and carboxylate moieties.

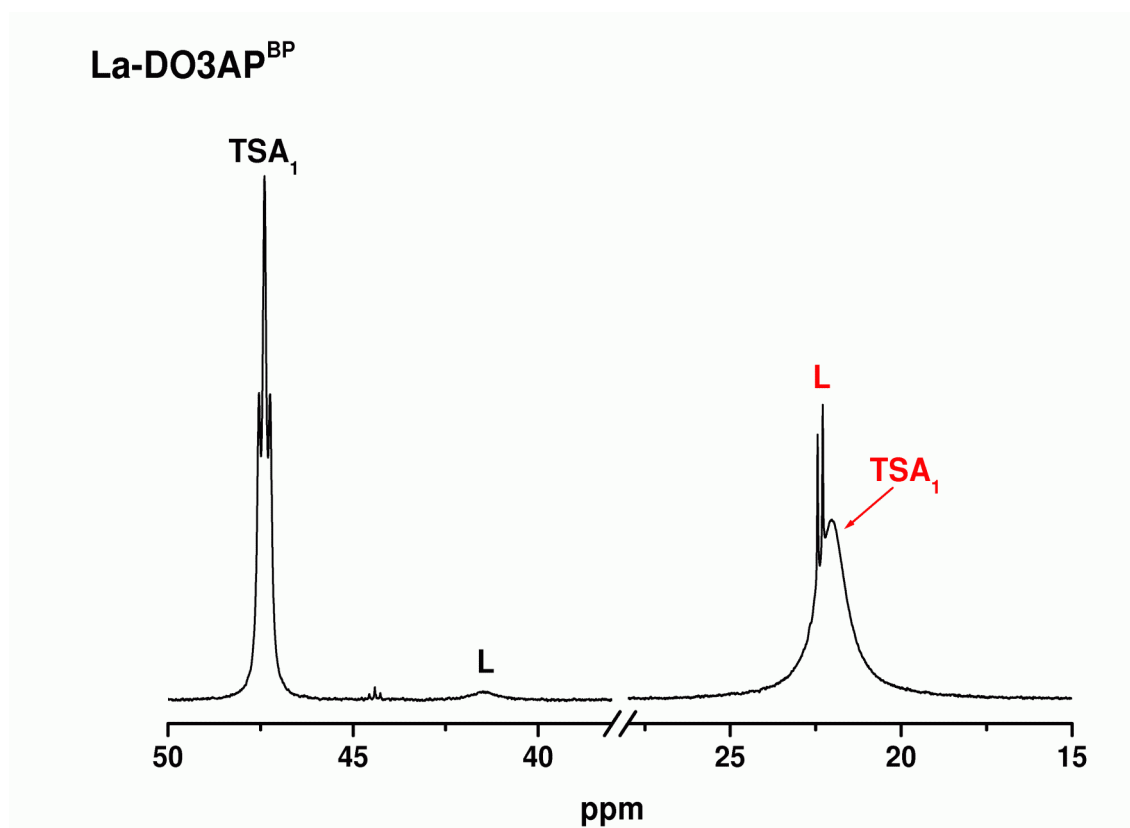

**Figure S2.**  $^{31}\text{P}\{^1\text{H}\}$  spectrum of the La-DO3AP<sup>BP</sup> complex (pH = 7.3, 25 °C, 400 MHz). The  $^{31}\text{P}\{^1\text{H}\}$  resonances of the free ligand in excess are labelled with 'L' (the phosphonate peak at  $\delta \sim 22$  ppm is a doublet due to coupling with the phosphinate P atom). Phosphinate resonances are labelled in black, phosphonate resonances are labelled in red. A small triplet close to  $\delta = 45$  ppm is due to a non-coordinating impurity.

### Ce-DO3AP<sup>BP</sup>

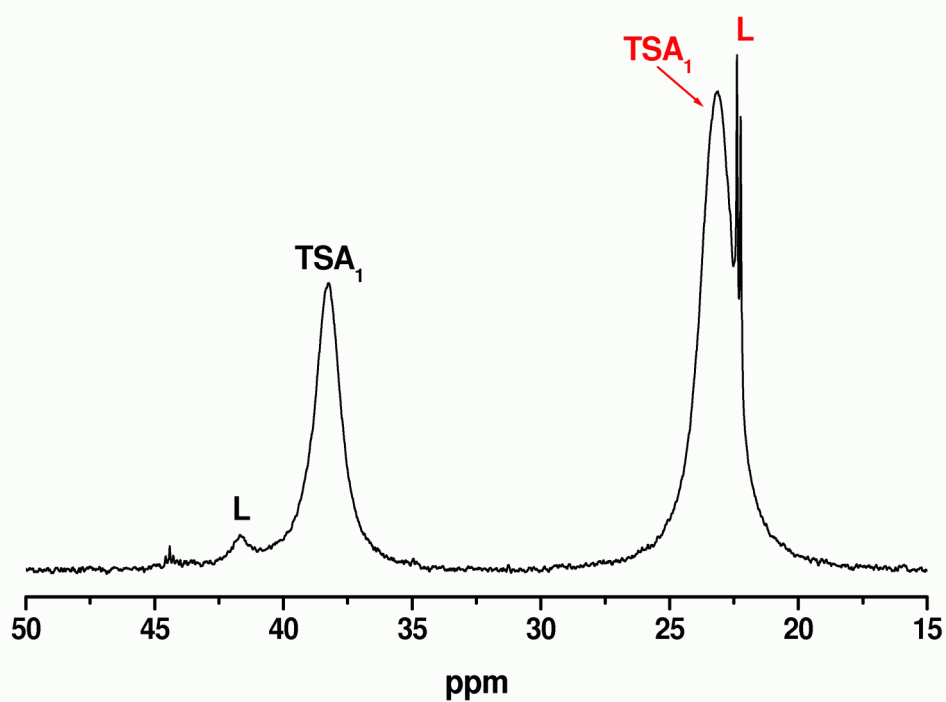

**Figure S3.**  $^{31}\text{P}\{^1\text{H}\}$  spectrum of the Ce-DO3AP<sup>BP</sup> complex (pH = 7.3, 25 °C, 400 MHz). The  $^{31}\text{P}\{^1\text{H}\}$  resonances of the free ligand in excess are labelled with 'L' (the phosphonate peak at  $\delta \sim 22$  ppm is a doublet due to coupling with the phosphinate P atom). Phosphinate resonances are labelled in black, phosphonate resonances are labelled in red. A small triplet close to  $\delta = 45$  ppm is due to a non-coordinating impurity.

# Pr-DO3AP<sup>BP</sup>

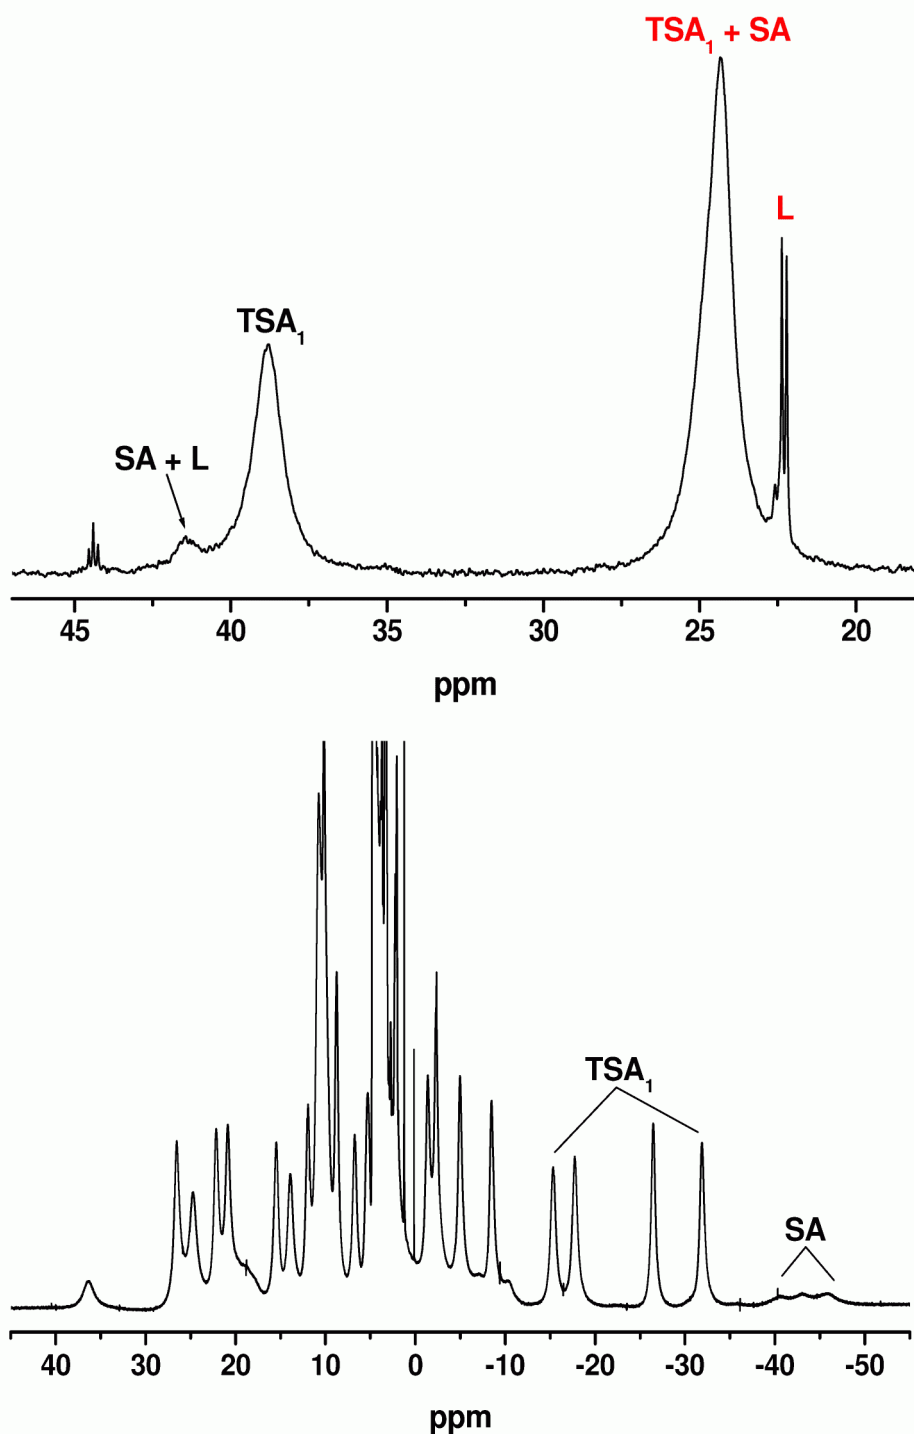

**Figure S4.**  $^{31}\text{P}\{^1\text{H}\}$  (above) and  $^1\text{H}$  NMR (below) spectra of the Pr-DO3AP<sup>BP</sup> complex (pH = 7.5, 25 °C, 400 MHz).  $^{31}\text{P}\{^1\text{H}\}$  spectrum – phosphinate resonances are labelled in black, phosphonate resonances are labelled in red, resonances of the free ligand in excess are labelled with ‘L’ (the phosphonate peak at  $\delta \sim 22$  ppm is a doublet due to coupling with the phosphinate phosphorus atom); a small triplet close to  $\delta = 45$  ppm is due to a non-coordinating impurity.

## Nd-DO3AP<sup>BP</sup>

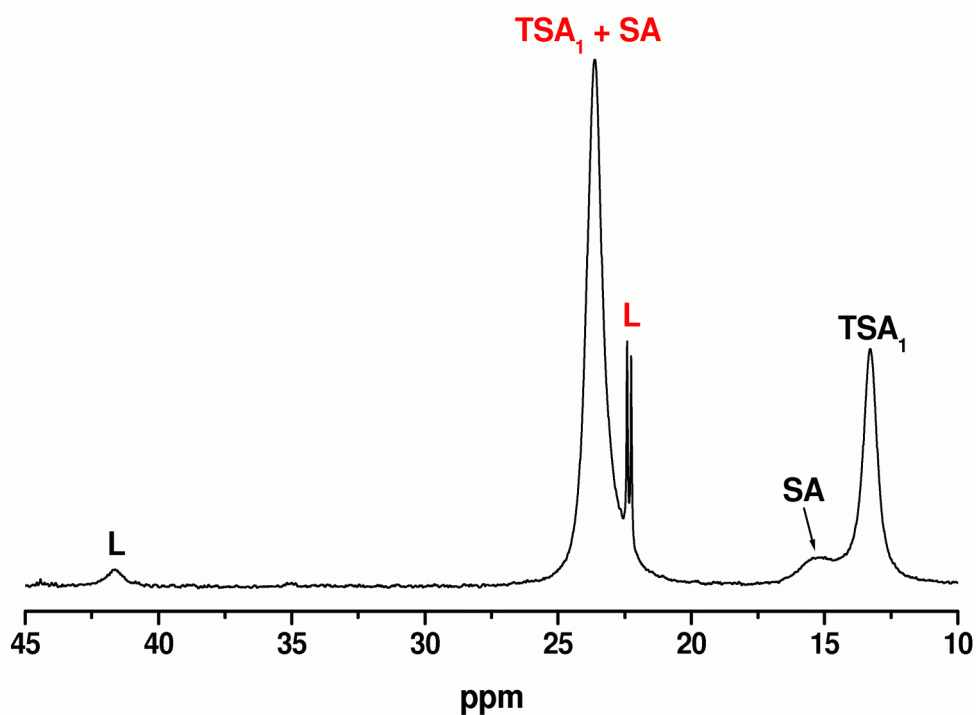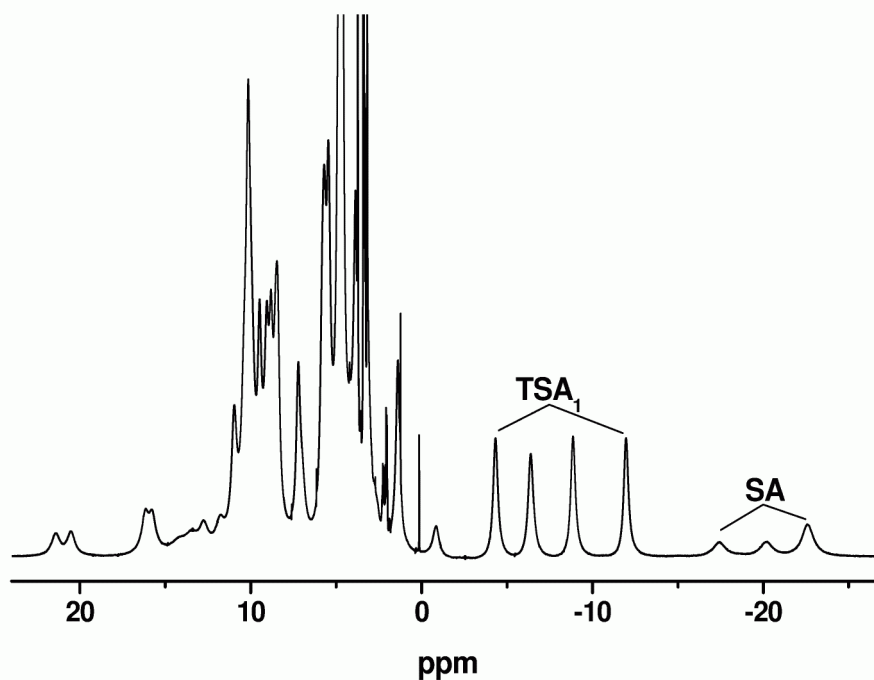

**Figure S5.**  $^{31}\text{P}\{^1\text{H}\}$  (above) and  $^1\text{H}$  NMR (below) spectra of the Nd-DO3AP<sup>BP</sup> complex (pH = 7.4, 25 °C, 400 MHz).  $^{31}\text{P}\{^1\text{H}\}$  spectrum – phosphinate resonances are labelled in black, phosphonate resonances are labelled in red, resonances of the free ligand in excess are labelled with 'L' (the phosphonate peak at  $\delta \sim 22$  ppm is a doublet due to coupling with the phosphinate phosphorus atom).

# Sm-DO3AP<sup>BP</sup>

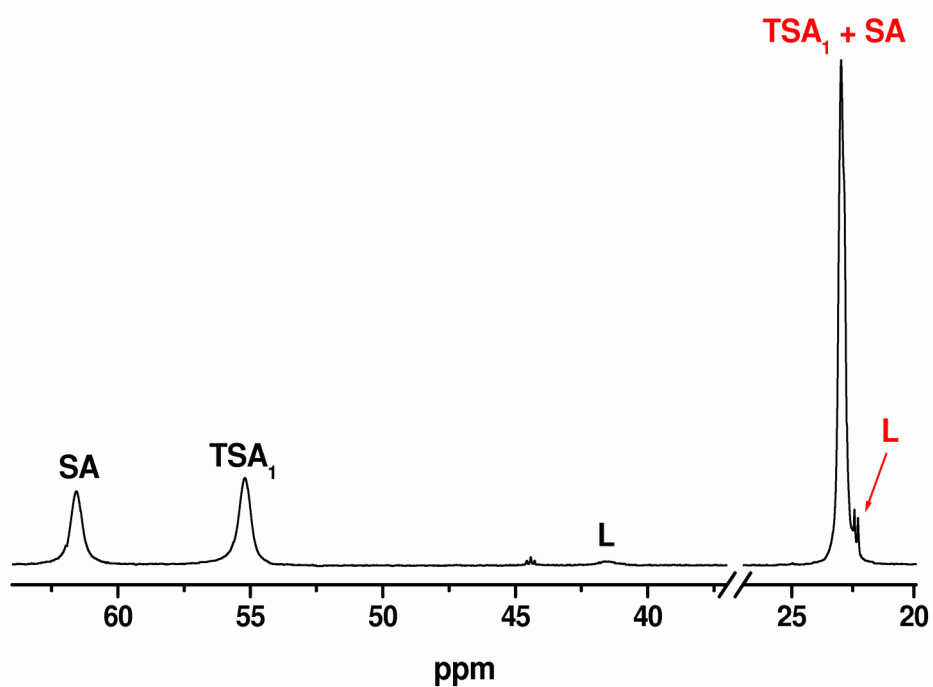

**Figure S6.**  $^{31}\text{P}\{^1\text{H}\}$  spectrum of the Sm-DO3AP<sup>BP</sup> complex (pH = 7.2, 25 °C, 400 MHz). The  $^{31}\text{P}\{^1\text{H}\}$  resonances of the free ligand in excess are labelled with 'L' (the phosphonate peak at  $\delta \sim 22$  ppm is a doublet due to coupling with the phosphinate phosphorus atom). Phosphinate resonances are labelled in black, phosphonate resonances are labelled in red. A small triplet close to  $\delta = 45$  ppm is due a non-coordinating impurity.



## Eu-DO3AP<sup>BP</sup>

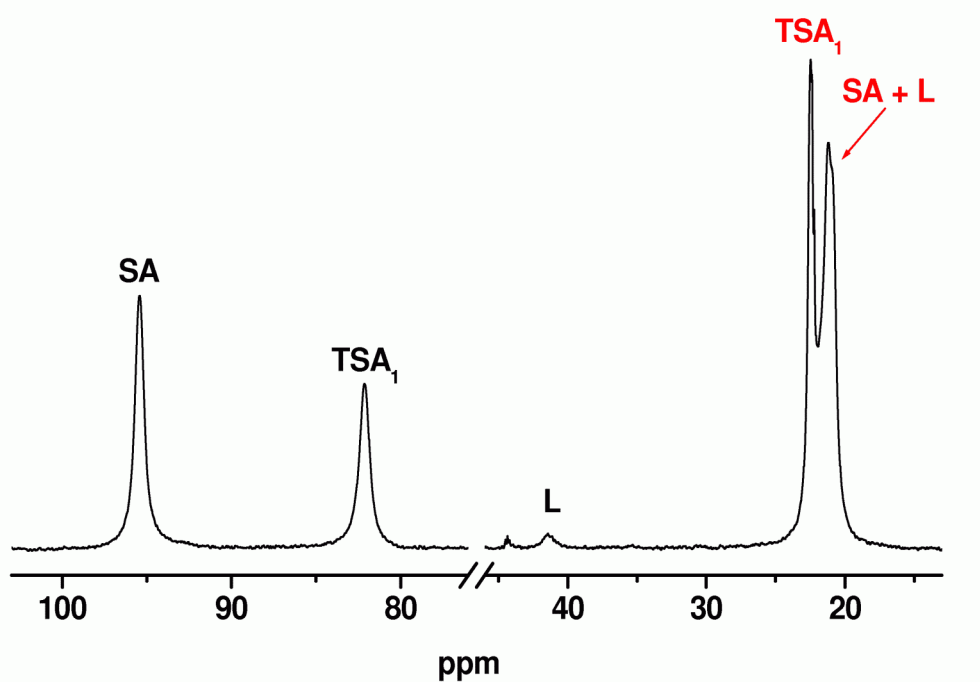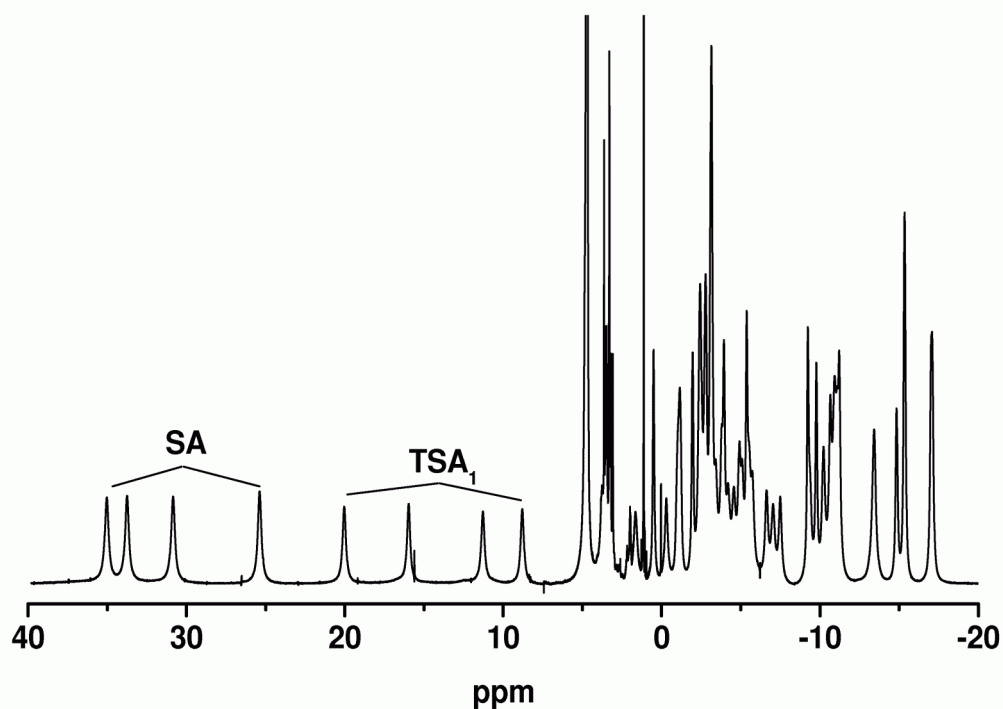

**Figure S7.**  $^{31}\text{P}\{^1\text{H}\}$  (above) and  $^1\text{H}$  NMR (below) spectra of the Eu-DO3AP<sup>BP</sup> complex (pH = 7.2, 25 °C, 400 MHz).  $^{31}\text{P}\{^1\text{H}\}$  spectrum – phosphinate resonances are labelled in black, phosphonate resonances are labelled in red, resonances of the free ligand in excess are labelled with 'L'; a small triplet close to  $\delta = 45$  ppm is due to a non-coordinating impurity.

# Tb-DO3AP<sup>BP</sup>

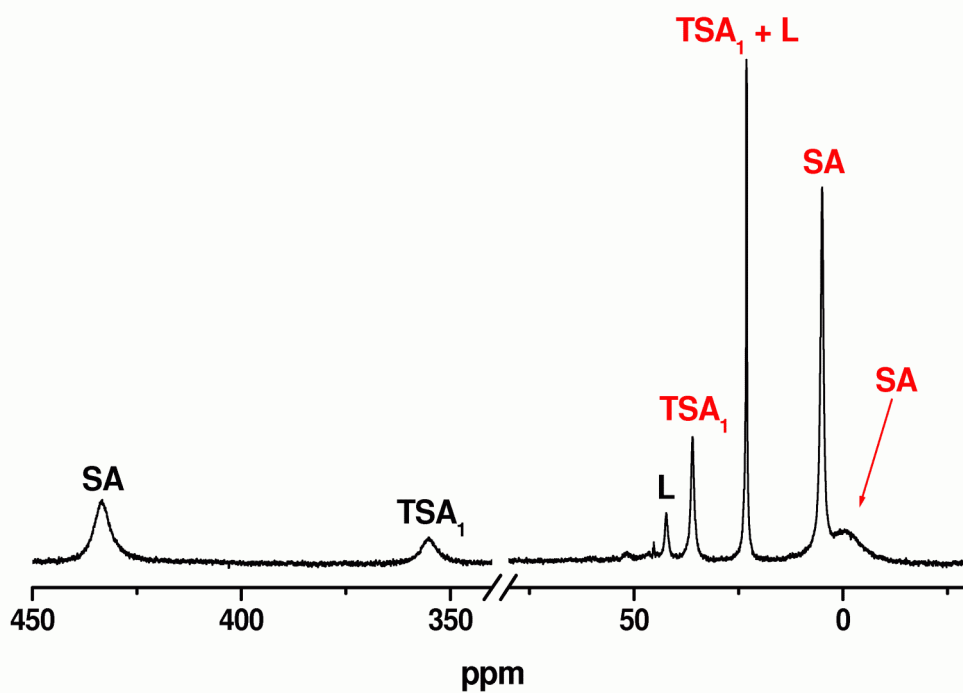

**Figure S8.**  $^{31}\text{P}\{^1\text{H}\}$  spectrum of the Tb-DO3AP<sup>BP</sup> complex (pH = 7.2, 25 °C, 400 MHz). The  $^{31}\text{P}\{^1\text{H}\}$  resonances of the free ligand in excess are labelled with 'L'. Phosphinate resonances are labelled in black, phosphonate resonances are labelled in red.

## Dy-DO3AP<sup>BP</sup>

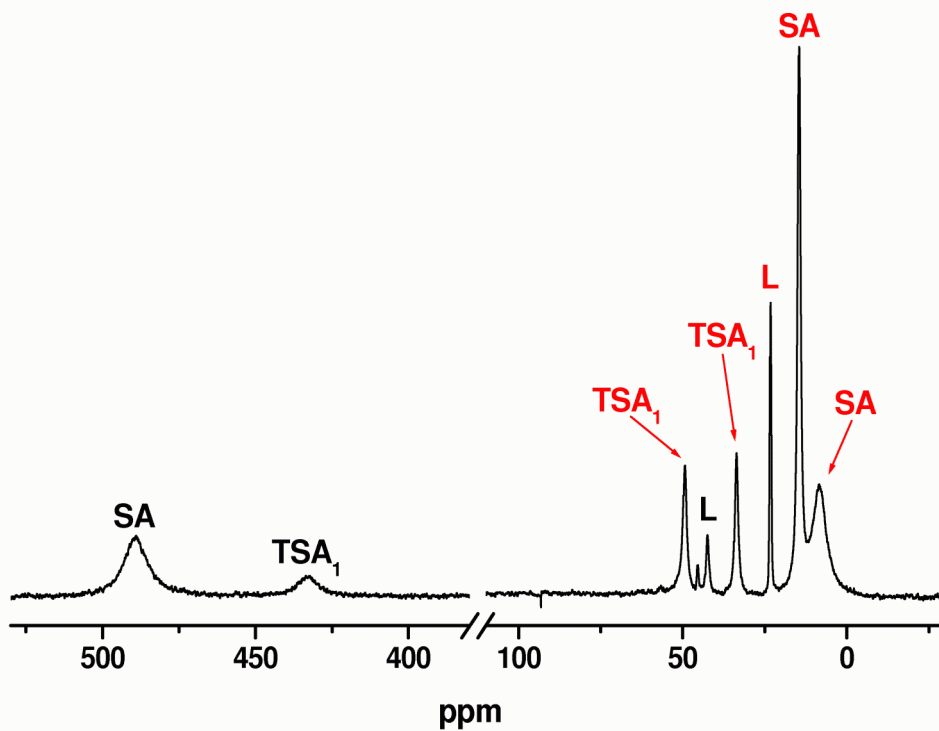

**Figure S9.**  $^{31}\text{P}\{^1\text{H}\}$  spectrum of the Dy-DO3AP<sup>BP</sup> complex (pH = 7.2, 25 °C, 400 MHz). The  $^{31}\text{P}\{^1\text{H}\}$  resonances of the free ligand in excess are labelled with 'L'. Phosphonate resonances are labelled in black, phosphinate resonances are labelled in red. A small peak close to  $\delta = 45$  ppm is due to a non-coordinating impurity.

## Ho-DO3AP<sup>BP</sup>

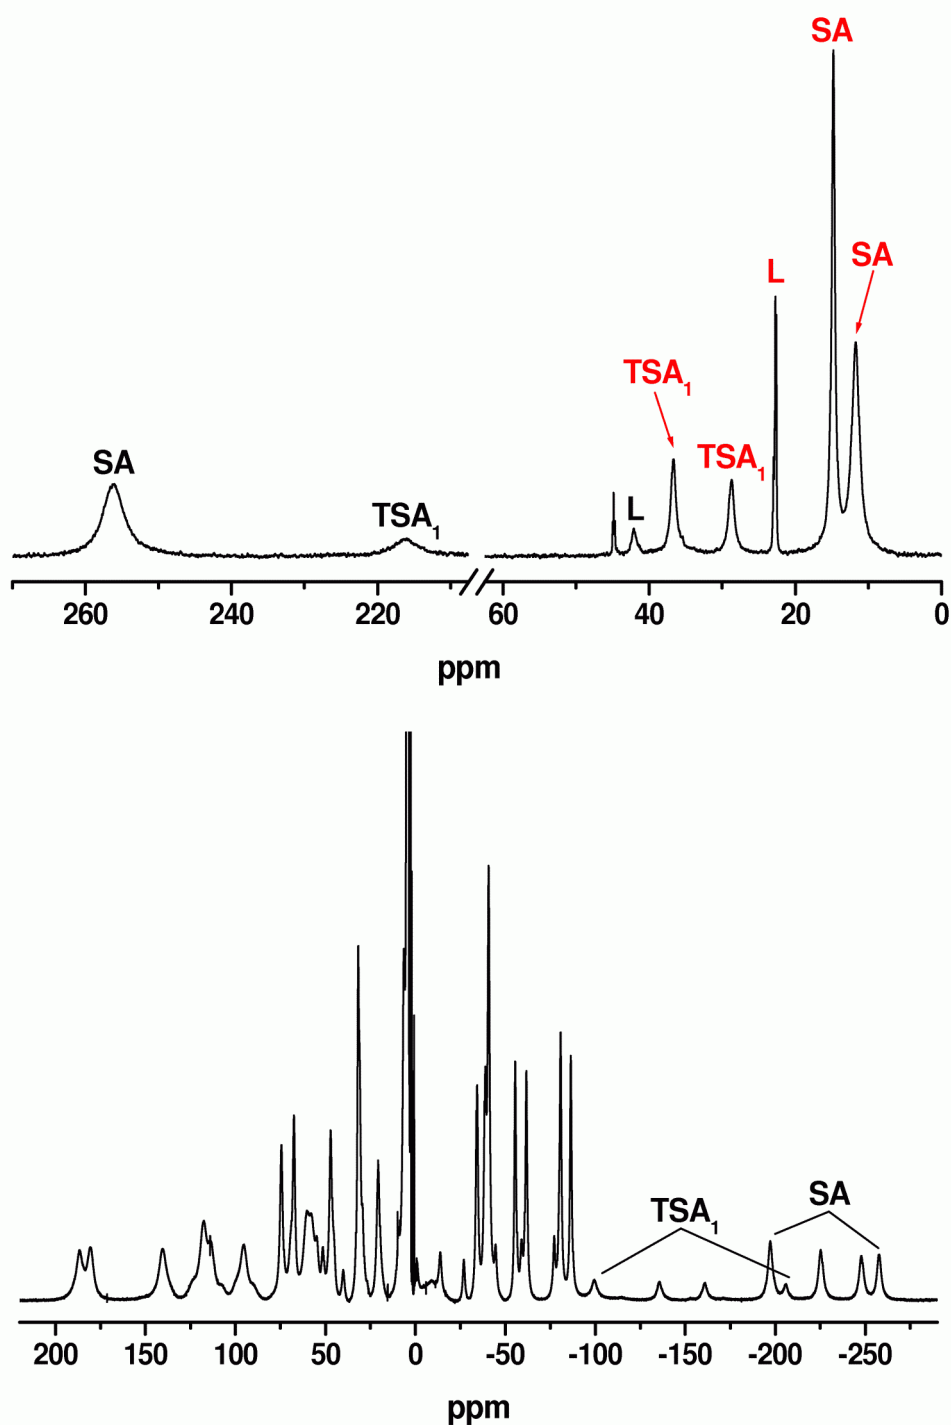

**Figure S10.**  $^{31}\text{P}\{^1\text{H}\}$  (above) and  $^1\text{H}$  NMR (below) spectra of the Ho-DO3AP<sup>BP</sup> complex (pH = 7.3, 25 °C, 400 MHz).  $^{31}\text{P}\{^1\text{H}\}$  spectrum – phosphinate resonances are labelled in black, phosphonate resonances are labelled in red, resonances of the free ligand in excess are labelled with 'L'; a small triplet close to  $\delta = 45$  ppm is due to a non-coordinating impurity.

Y-DO3AP<sup>BP</sup>

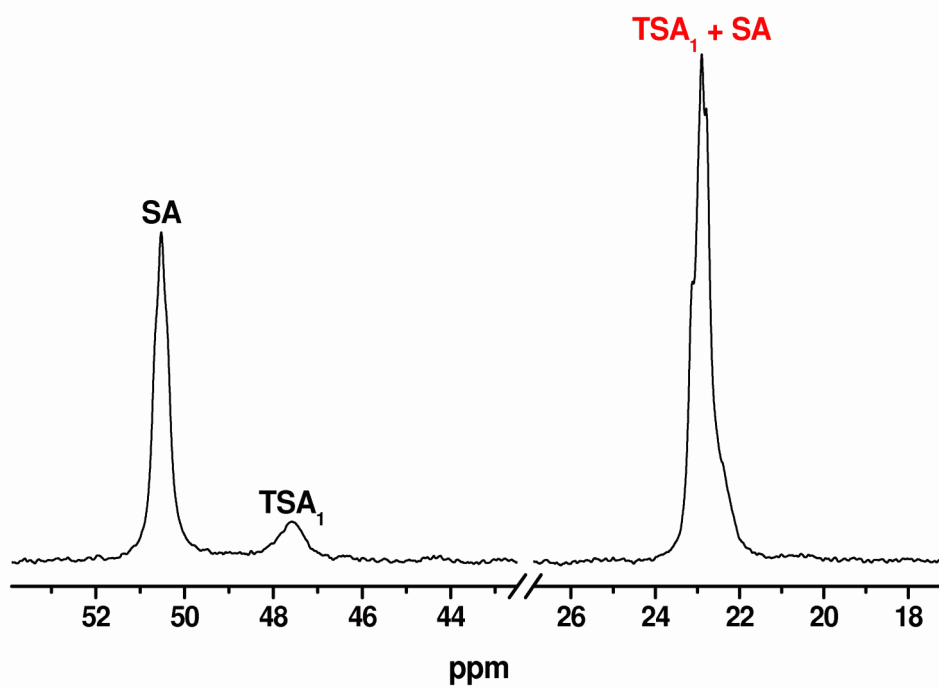

**Figure S11.**  $^{31}\text{P}\{^1\text{H}\}$  spectrum of the Y-DO3AP<sup>BP</sup> complex (pH = 7.0, 25 °C, 400 MHz). In this case no excess of free ligand was used. Phosphinate resonances are labelled in black, phosphonate resonances are labelled in red.

# Er-DO3AP<sup>BP</sup>

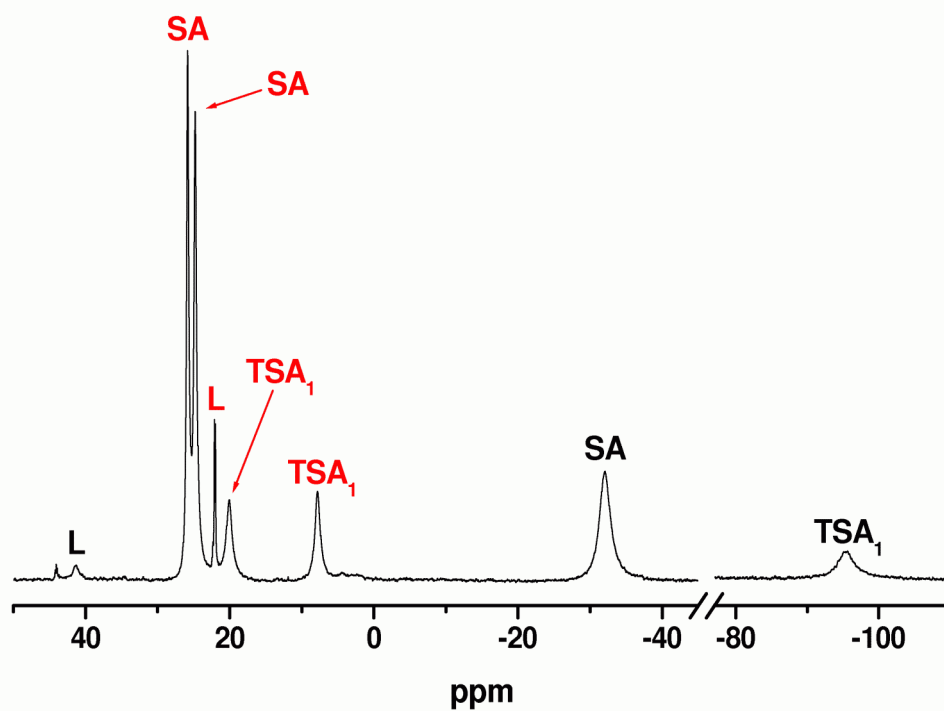

**Figure S12.**  $^{31}\text{P}\{^1\text{H}\}$  spectrum of the Er-DO3AP<sup>BP</sup> complex (pH = 7.4, 25 °C, 400 MHz). The  $^{31}\text{P}\{^1\text{H}\}$  resonances of the free ligand in excess are labelled with 'L'. Phosphinate resonances are in black, phosphonate resonances are in red. A small triplet close to  $\delta = 45$  ppm is due to a non-coordinating impurity.

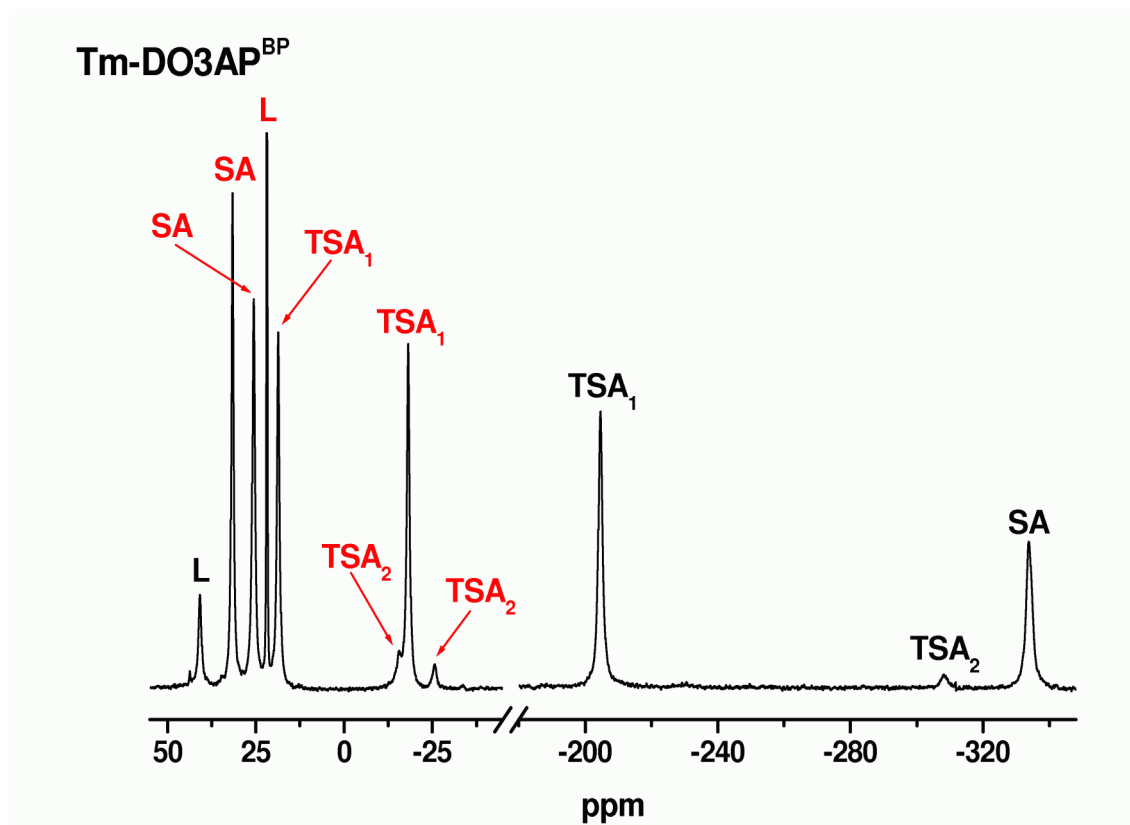

**Figure S13.**  $^{31}\text{P}\{^1\text{H}\}$  spectrum of the Tm-DO3AP<sup>BP</sup> complex (pH = 7.3, 25 °C, 400 MHz). The  $^{31}\text{P}\{^1\text{H}\}$  resonances of the free ligand in excess are labelled with 'L'. Phosphinate resonances are labelled in black, phosphonate resonances are labelled in red.

Yb-DO3AP<sup>BP</sup>

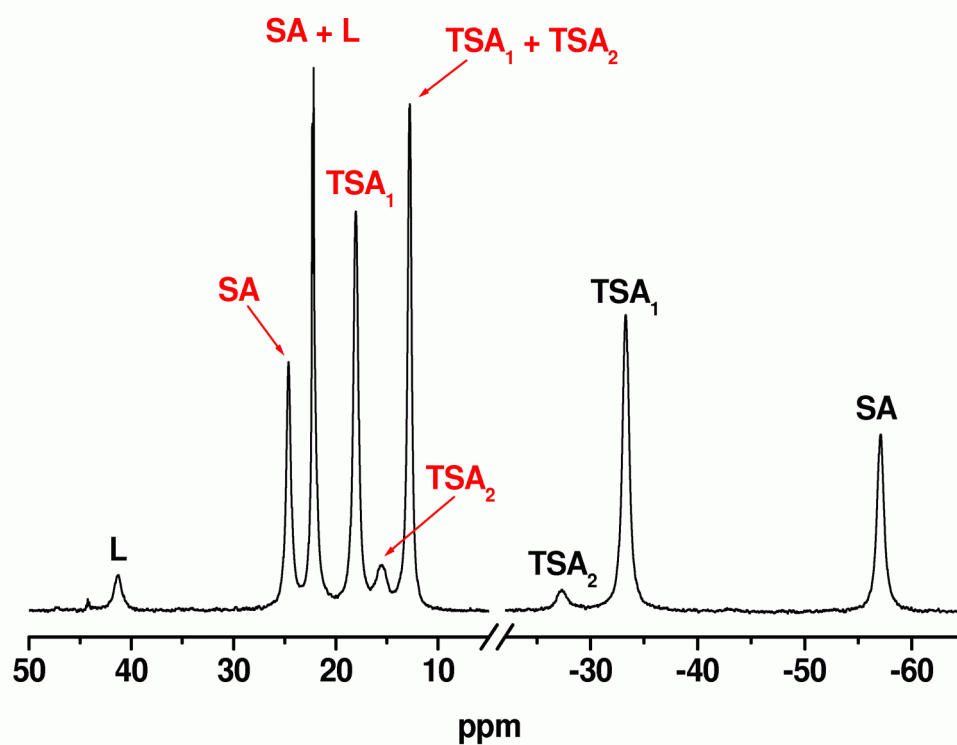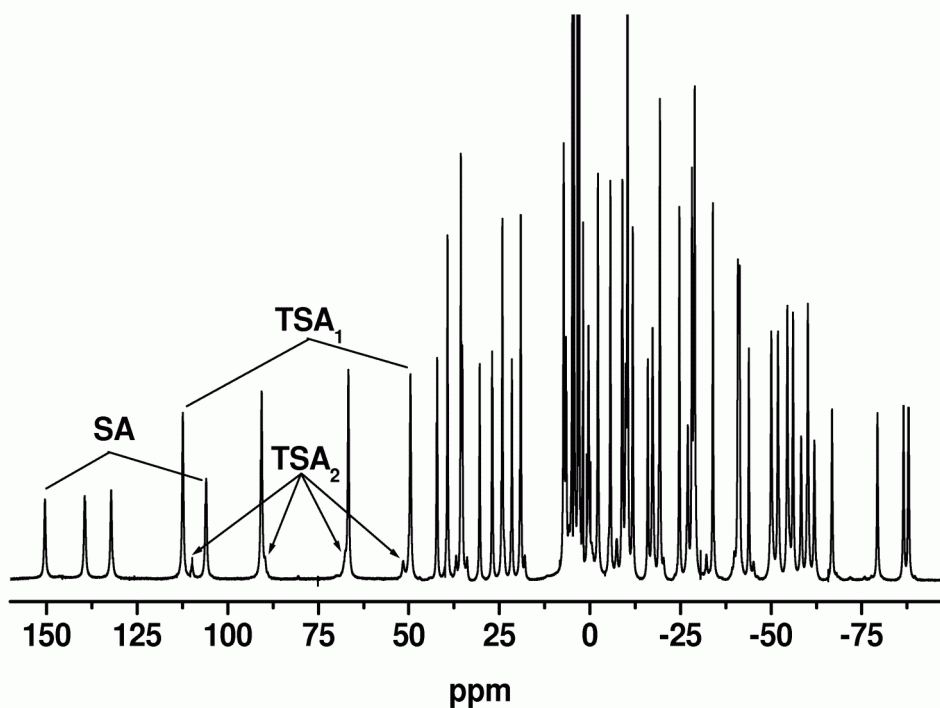

**Figure S14.**  $^{31}\text{P}\{^1\text{H}\}$  (above) and  $^1\text{H}$  NMR (below) spectra of the Yb-DO3AP<sup>BP</sup> complex (pH = 7.3, 25 °C, 400 MHz).  $^{31}\text{P}\{^1\text{H}\}$  spectrum – phosphinate resonances are labelled in black, phosphonate resonances are labelled in red, resonances of the free ligand in excess are labelled with 'L'; a small peak close to  $\delta = 45$  ppm is due to a non-coordinating impurity.



# Lu-DO3AP<sup>BP</sup>

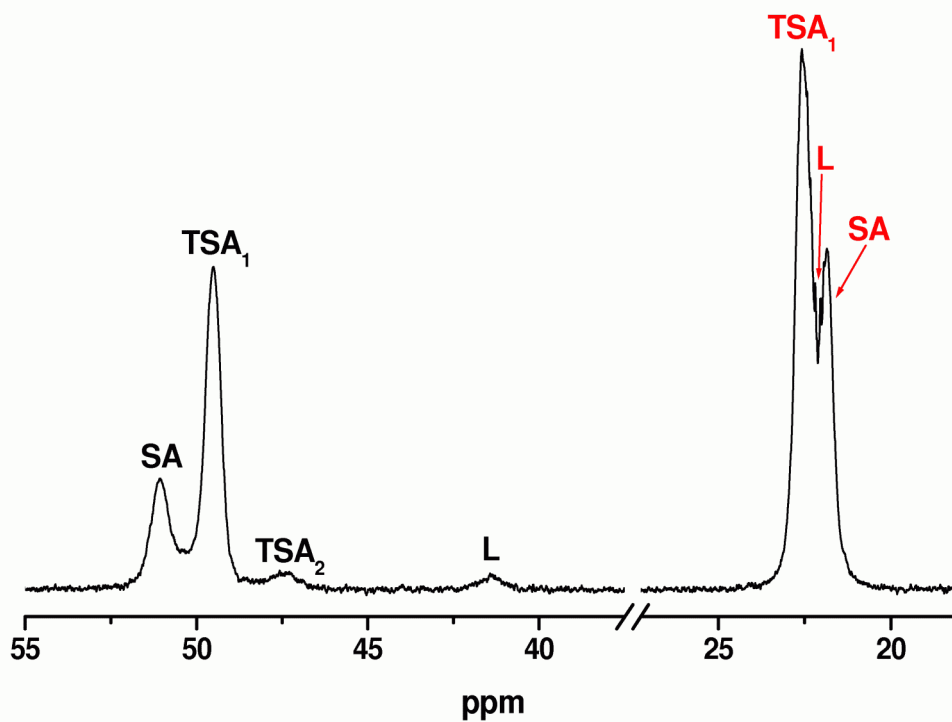

**Figure S15.**  $^{31}\text{P}\{^1\text{H}\}$  spectrum of the Lu-DO3AP<sup>BP</sup> complex (pH = 7.0, 25 °C, 400 MHz). The  $^{31}\text{P}\{^1\text{H}\}$  resonances of the free ligand in excess are labelled with 'L'. Phosphinate resonances are labelled in black, phosphonate resonances are labelled in red.

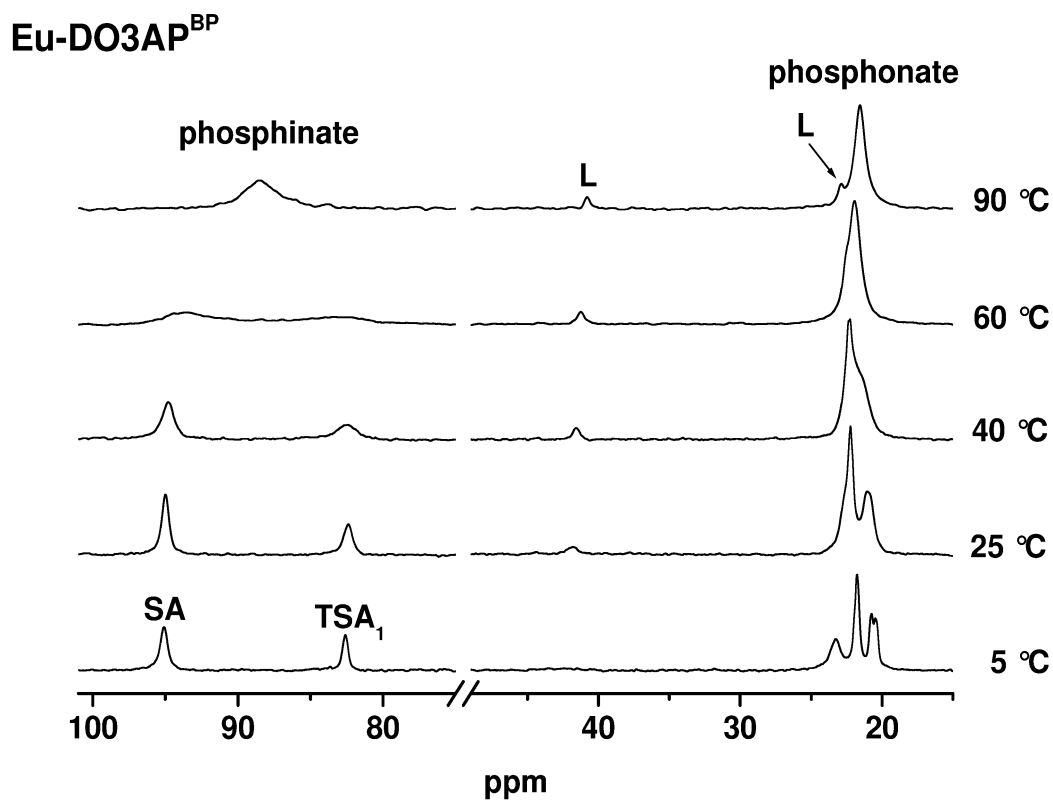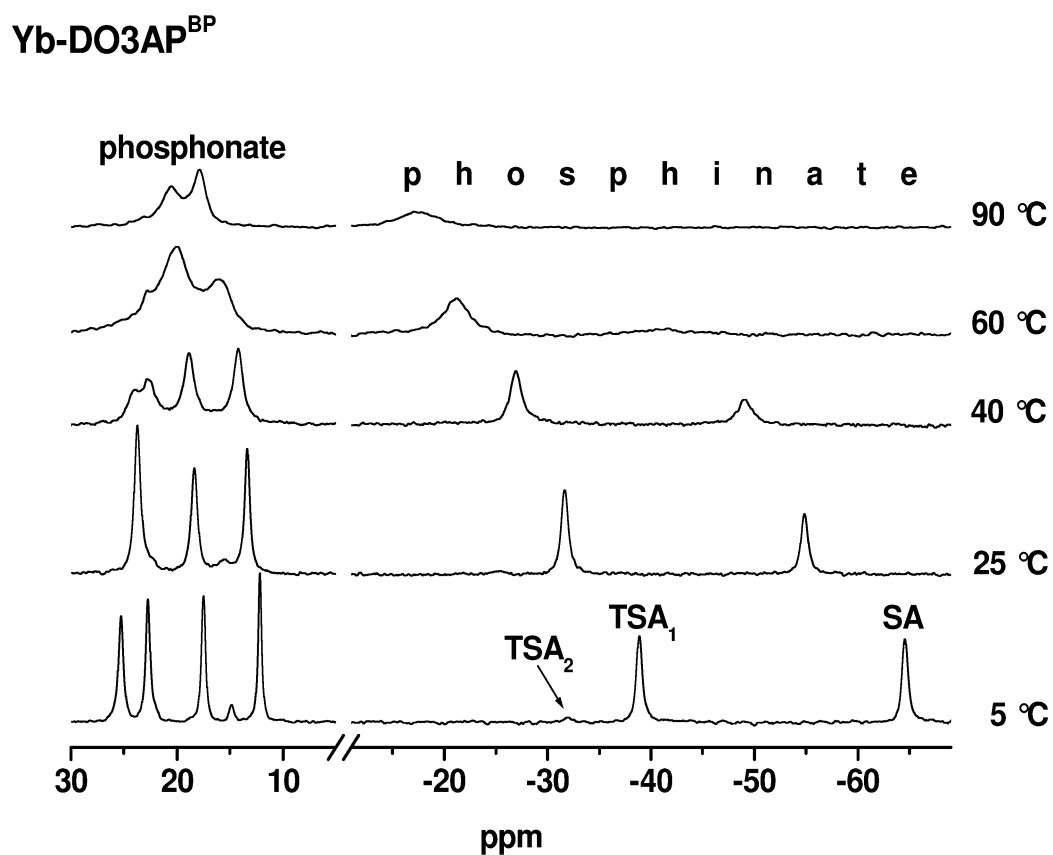

**Figure S16.**  $^{31}\text{P}\{^1\text{H}\}$  spectra of the Eu-DO3AP<sup>BP</sup> (above) and Yb-DO3AP<sup>BP</sup> (below) complexes at different temperatures (pH = 7). The  $^{31}\text{P}\{^1\text{H}\}$  resonances of the free ligand in excess are labelled with 'L'.

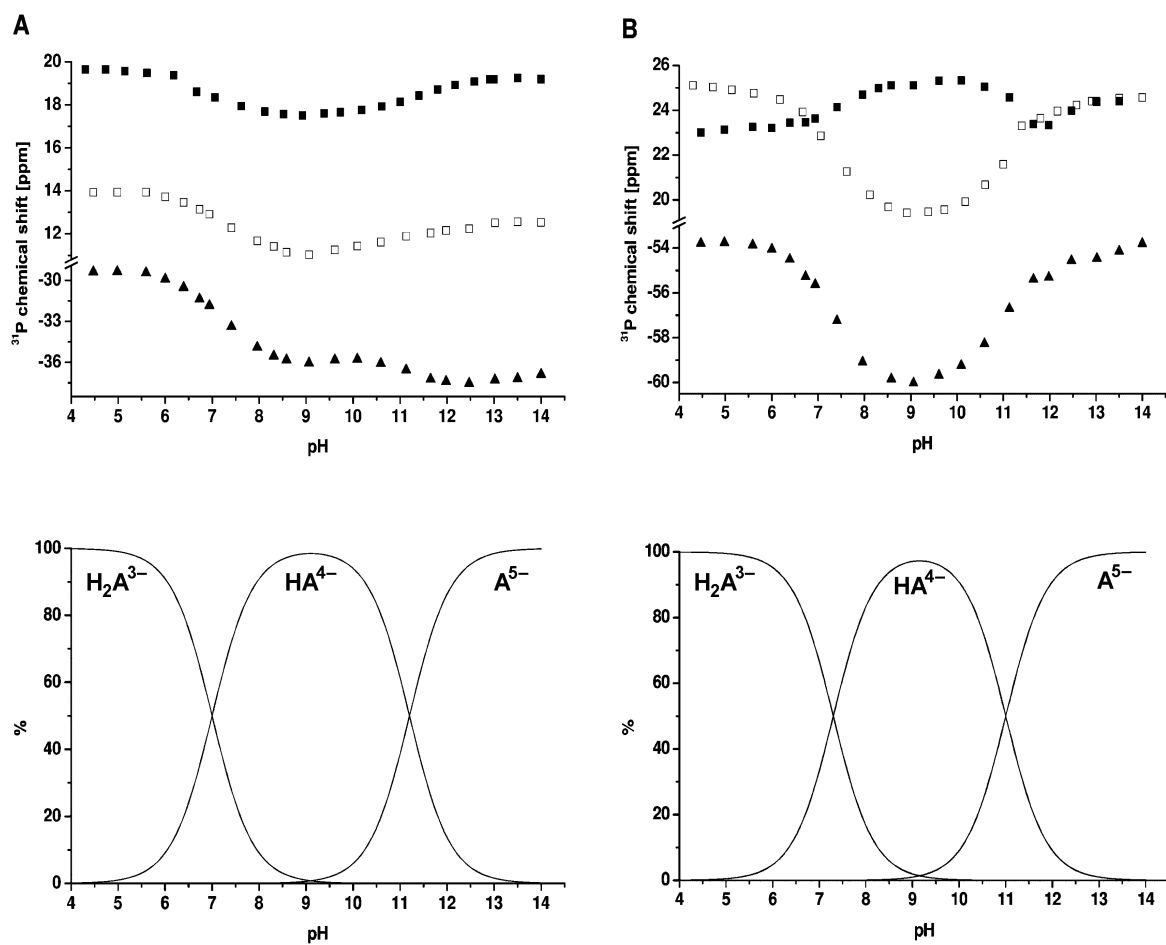

**Figure S17.**  $^{31}\text{P}\{^1\text{H}\}$  titration curves of phosphinate ( $\blacktriangle$ ) and two non-equivalent  $^{31}\text{P}$  atoms of bis(phosphonate) moiety ( $\blacksquare$ ,  $\square$ ) of the SA (A) and TSA (B) diastereoisomers in the Yb-DO3AP<sup>BP</sup> complex, and corresponding distribution diagrams (below),  $\text{A}^{5-}$  denotes the fully deprotonated Yb-DO3AP<sup>BP</sup> complex.

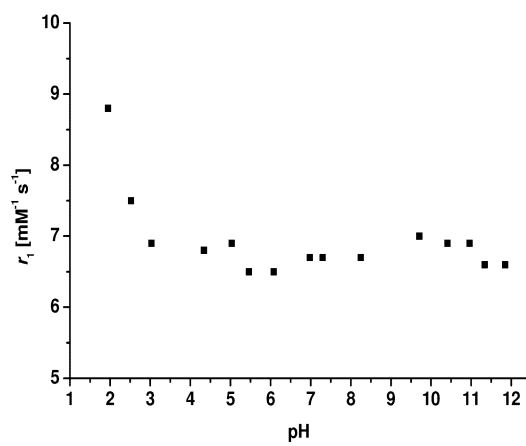

**Figure S18.** pH dependence of the relaxivity for the Gd-DO3AP<sup>BP</sup> complex (2 mM, 20 MHz, 25 °C).

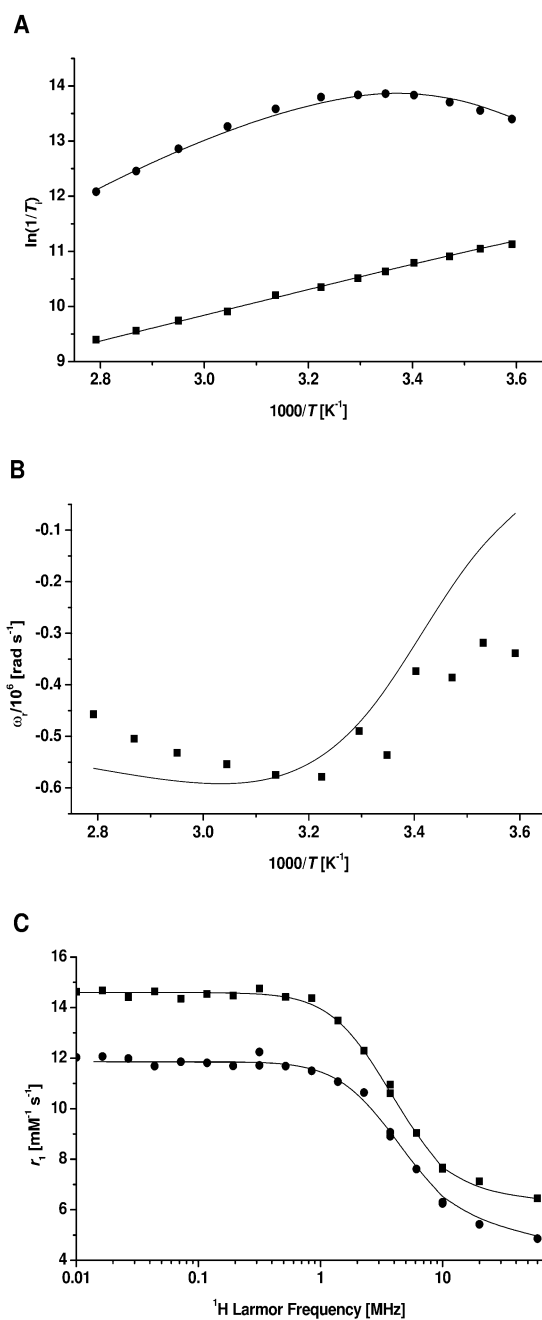

**Figure S19.** The temperature dependence of longitudinal (A, ■) and transverse relaxation times (A, ●) and reduced  $^{17}\text{O}$  NMR chemical shifts (B) of water for the Gd-DO3AP<sup>BP</sup> complex (87 mM, pH = 6, 400 MHz).  $^1\text{H}$  NMRD profiles of the Gd-DO3AP<sup>BP</sup> complex in aqueous solution at 25 °C (C, ■) and 37 °C (C, ●) (2.5 mM, pH = 6). The curves represent simultaneous least-squares fits of the  $^{17}\text{O}$  data and the  $^1\text{H}$  NMRD profiles.

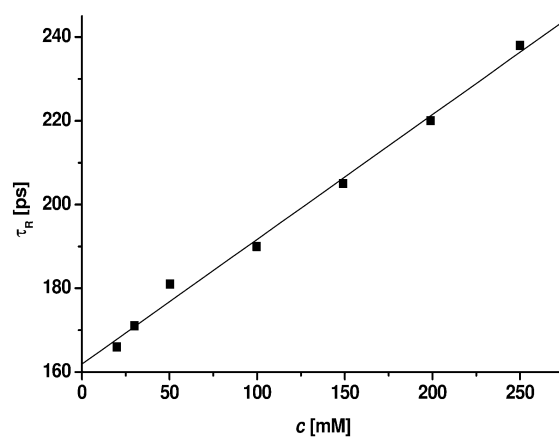

**Figure S20.** The  $\tau_R$  values of the deuterated La-DO3AP<sup>BP</sup> complex as a function of concentration (20–250 mM, pH = 7.5, 25 °C). The equation of a linear fit:  $y = 0.299x + 161.7$ ; correlation coefficient  $R^2 = 0.993$ .

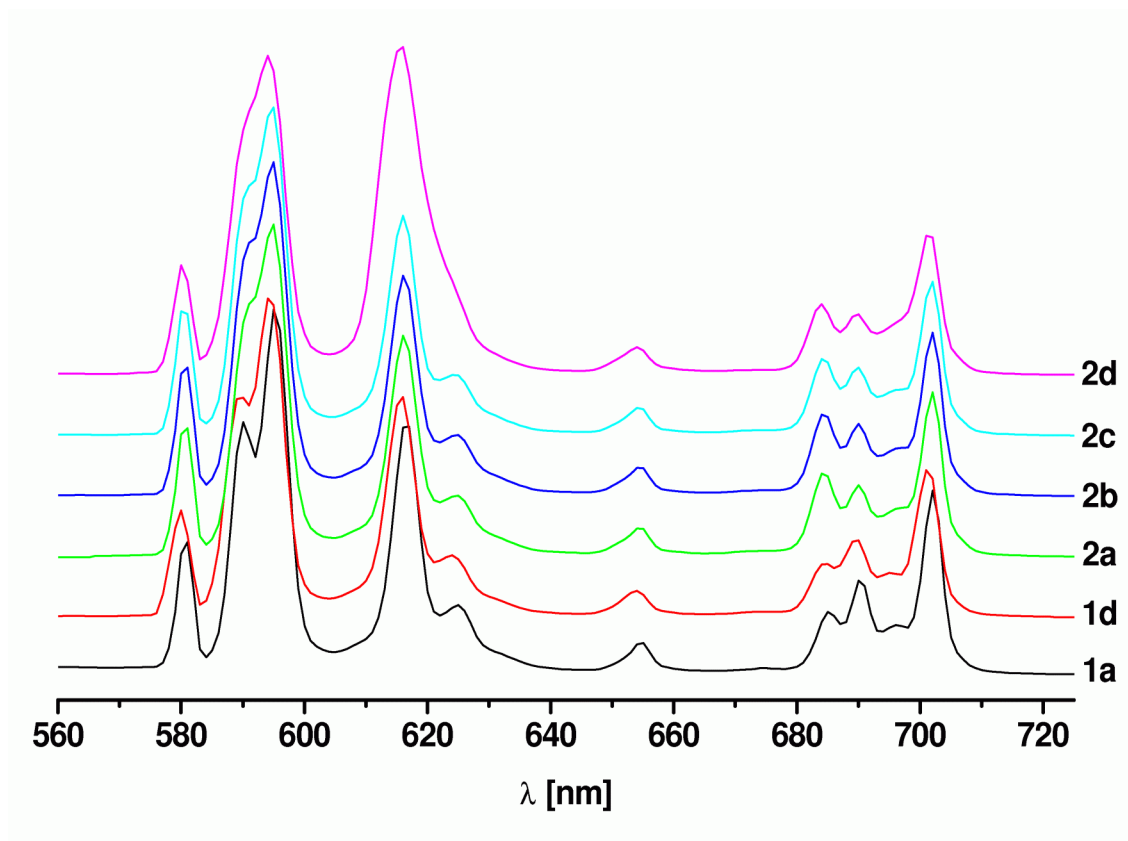

**Figure S21.** Luminescence emission spectra of the Eu-DO3AP<sup>BP</sup> complex (62 mM, pH = 7) in the presence of phosphate (67 mM) (labelled with 1); and in the presence of phosphate (67 mM) and 3 eq. of Zn(II) ions (labelled with 2) as a function of time (*a* – 0 min, *b* – 5 min, *c* – 90 min, *d* – 3 days).

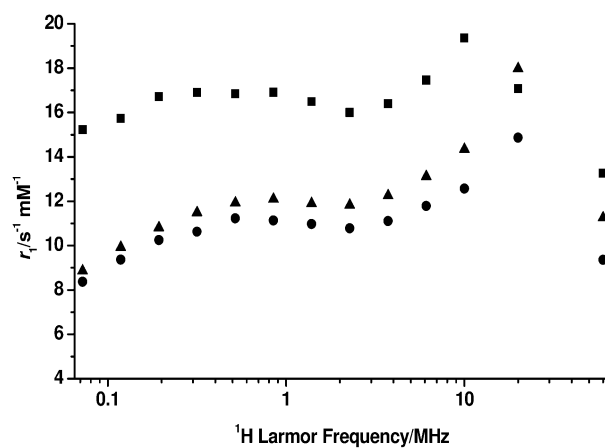

**Figure S22.**  $^1\text{H}$  NMRD profiles of the Gd-DO3APBP (■), Gd-BPAMD (●) and Gd-BPAPD (▲) complexes adsorbed on HA under analogous conditions (pH = 7.5, 25 °C). Diamagnetic contribution to  $r_1$  was subtracted.



**Table S1.** Experimental parameters found in the crystal structure of DO3AP<sup>BP</sup>·2.25H<sub>2</sub>O.

|                                                                             |                                                                                     |
|-----------------------------------------------------------------------------|-------------------------------------------------------------------------------------|
| Formula                                                                     | C <sub>17</sub> H <sub>39.50</sub> N <sub>4</sub> O <sub>16.25</sub> P <sub>3</sub> |
| <i>M<sub>r</sub></i>                                                        | 652.94                                                                              |
| Size (mm)                                                                   | 0.25×0.25×0.50                                                                      |
| Crystal shape                                                               | Prism                                                                               |
| Colour                                                                      | Colourless                                                                          |
| Crystal system                                                              | Monoclinic                                                                          |
| Space group                                                                 | <i>P</i> 2 <sub>1</sub> / <i>n</i> (No. 14)                                         |
| <i>a</i> (Å)                                                                | 8.78940(10)                                                                         |
| <i>b</i> (Å)                                                                | 24.6443(3)                                                                          |
| <i>c</i> (Å)                                                                | 12.78370(10)                                                                        |
| β (°)                                                                       | 95.0428(6)                                                                          |
| <i>U</i> (Å <sup>3</sup> )                                                  | 2758.34(5)                                                                          |
| <i>Z</i>                                                                    | 4                                                                                   |
| <i>D<sub>c</sub></i> (g cm <sup>-3</sup> )                                  | 1.572                                                                               |
| μ (mm <sup>-1</sup> )                                                       | 0.298                                                                               |
| <i>F</i> (000)                                                              | 1378                                                                                |
| Range of θ (°)                                                              | 1.80–27.44                                                                          |
| Range of indexes ( <i>hkl</i> )                                             | –11 < <i>h</i> < 11<br>–31 < <i>k</i> < 31<br>–16 < <i>l</i> < 16                   |
| Collected refl.                                                             | 47012                                                                               |
| Unique refl.                                                                | 6277                                                                                |
| Observed refl. [ <i>I</i> > 2σ( <i>I</i> )]                                 | 5560                                                                                |
| <i>R</i> <sub>int</sub>                                                     | 0.0290                                                                              |
| Restrictions, parameters                                                    | 0, 370                                                                              |
| G-o-f                                                                       | 1.047                                                                               |
| <i>R</i> ; <i>wR</i> (all data)                                             | 0.0310; 0.0813                                                                      |
| <i>R</i> <sup>2</sup> ; <i>wR</i> <sup>2</sup> [ <i>I</i> > 2σ( <i>I</i> )] | 0.0365; 0.0853                                                                      |
| Residual min/max of electronic density (e Å <sup>-3</sup> )                 | –0.424; 0.495                                                                       |

**Table S2.** Hydrogen bond geometries found in the crystal structure of DO3AP<sup>BP</sup>·2.25H<sub>2</sub>O.

| D–H       | <i>d</i> (D–H) / Å | <i>d</i> (H⋯A) / Å | <D–H–A / ° | <i>d</i> (D⋯A) / Å | A                            |
|-----------|--------------------|--------------------|------------|--------------------|------------------------------|
| N1–H11    | 0.910              | 2.276              | 131.5      | 2.958              | O512                         |
| N1–H11    | 0.910              | 2.511              | 107.7      | 2.920              | N4                           |
| N1–H11    | 0.910              | 2.600              | 108.6      | 3.016              | N10                          |
| N7–H71    | 0.910              | 2.277              | 132.5      | 2.969              | O312                         |
| N7–H71    | 0.910              | 2.618              | 108.1      | 3.028              | N4                           |
| N7–H71    | 0.910              | 2.426              | 108.6      | 2.850              | N10                          |
| O21–H21P  | 0.857              | 1.678              | 175.7      | 2.533              | O12                          |
| O31–H31P  | 0.933              | 1.558              | 171.0      | 2.484              | O22 [ -x+2, -y+1, -z+1 ]     |
| O32–H32P  | 0.937              | 1.566              | 169.2      | 2.492              | O23 [ -x+2, -y+1, -z+1 ]     |
| O311–H311 | 0.919              | 1.671              | 170.2      | 2.582              | O11 [ x+1/2, -y+1/2, z+1/2 ] |
| O411–H411 | 0.883              | 1.687              | 162.5      | 2.543              | O33 [ x+1/2, -y+1/2, z+1/2 ] |
| O511–H511 | 0.830              | 1.796              | 163.3      | 2.601              | O1W                          |
| O1W–H11W  | 0.761              | 2.184              | 143.1      | 2.830              | O11 [ x+1, y, z ]            |
| O1W–H12W  | 0.835              | 2.057              | 158.1      | 2.849              | O22                          |
| O1W–H12W  | 0.835              | 2.502              | 120.6      | 3.014              | O32                          |
| O2W–H21W  | 0.838              | 2.098              | 166.7      | 2.920              | O11 [ x+1/2, -y+1/2, z+1/2 ] |
| O2W–H22W  | 0.887              | 2.076              | 176.5      | 2.961              | O33 [ x-1/2, -y+1/2, z+1/2 ] |

**Table S3.** The  $^1\text{H}$  relaxivity  $r_1$  (20 MHz) and parameters governing it in the Gd-DO3AP<sup>BP</sup> complex at pH 6, 7.5 and 10 as obtained from the simultaneous fitting of  $^{17}\text{O}$  NMR and  $^1\text{H}$  NMRD data. Experimental points of the  $^1\text{H}$  relaxivity are given in brackets.

| parameter                                                 | pH = 6            | pH = 7.5          |
|-----------------------------------------------------------|-------------------|-------------------|
| $^{298}r_1/\text{s}^{-1} \text{ mM}^{-1}$                 | 6.8 (7.1)         | 6.9 (7.4)         |
| $^{310}r_1/\text{s}^{-1} \text{ mM}^{-1}$                 | 5.5 (5.4)         | 5.7 (5.6)         |
| $k_{\text{ex}}^{298}/10^6 \text{ s}^{-1}$                 | $4.45 \pm 0.47$   | $5.06 \pm 0.75$   |
| $\tau_{\text{M}}^{298}/\text{ns}$                         | $224 \pm 24$      | $198 \pm 29$      |
| $\Delta H^{\ddagger}/\text{kJ mol}^{-1}$                  | $51.1 \pm 3.2$    | $51.1 \pm 4.0$    |
| $E_{\text{R}}/\text{kJ mol}^{-1}$                         | $19.4 \pm 0.9$    | $21.6 \pm 1.2$    |
| $\tau_{\text{R}}^{\text{H}}/\text{ps}$                    | $122.7 \pm 5.0$   | $134.0 \pm 7.7$   |
| $(\tau_{\text{R}}^{\text{O}}/\tau_{\text{R}}^{\text{H}})$ | $1.41 \pm 0.08$   | $1.19 \pm 0.09$   |
| $\tau_{\text{V}}^{298}/\text{ps}$                         | $8.8 \pm 1.4$     | $7.1 \pm 1.3$     |
| $\Delta^2/10^{19} \text{ s}^{-2}$                         | $4.08 \pm 0.93$   | $5.99 \pm 1.54$   |
| $(A/\hbar)/\text{MHz}$                                    | $-3.04 \pm 0.26$  | $-3.24 \pm 0.36$  |
| $\delta g_{\text{L}}^2$                                   | $0.038 \pm 0.012$ | $0.024 \pm 0.015$ |
| $q_{\text{ss}}$                                           | $1.42 \pm 0.08$   | $1.81 \pm 0.10$   |

Fixed parameters:

$$D_{\text{GdH}}^{298} = 2.39 \times 10^{-9} \text{ m}^2 \text{ s}^{-1}$$

$$E_{\text{DGH}} = 18.2 \text{ kJ mol}^{-1}$$

$$r_{\text{GdH}} = 3.1 \text{ \AA}$$

$$r_{\text{GdO}} = 2.5 \text{ \AA}$$

$$r_{\text{GdHss}} = 3.5 \text{ \AA}$$

$$r_{\text{Oss}} = 4.1 \text{ \AA}$$

$$k_{\text{ss}}^{298} = 2 \times 10^{10} \text{ s}^{-1}$$

$$\tau_{\text{Mss}}^{298} = 56 \text{ ps}$$

$$\Delta H^{\ddagger \text{ss}} = 30 \text{ kJ mol}^{-1}$$

$$E_{\text{v}} = 1 \text{ kJ mol}^{-1}$$

$$\chi(1+\eta^2/3)^{1/2} = 7.58 \text{ MHz}$$

**Table S4.** The luminescence lifetimes measured for the Eu-DO3AP<sup>BP</sup> complex in the presence of phosphate (67 mM, pH = 7) and 3 eq. of ZnCl<sub>2</sub>, and for the reference sample without Zn(II) ions.

| time [days] | lifetime $\tau_{\text{H}_2\text{O}}$<br>[ $\mu\text{s}$ ] |                                              |
|-------------|-----------------------------------------------------------|----------------------------------------------|
|             | Eu-DO3AP <sup>BP</sup> + 3 eq.<br>ZnCl <sub>2</sub>       | Eu-DO3AP <sup>BP</sup><br>(reference sample) |
| 0           | 704                                                       | 720                                          |
| 3           | 745                                                       | 752                                          |
